# Supplementary material for: Domestication of Transposable Elements into MicroRNA Genes in Plants
Source: PLoS One. 2011 May 3;6(5):e19212. doi: 10.1371/journal.pone.0019212 (PMC3086885; doi:10.1371/journal.pone.0019212)
Supplement: Table S3 — Copy number of canonical rice miRNAs in the rice genome. (XLS) [file pone.0019212.s007.xls]

## Sheet: Sheet1
Table S3. Copy number of canonical rice miRNAs in the rice genome.
Number of hit in rice genome	miRNA
4	osa-miR399e:osa-miR399g:osa-miR399f
1	osa-miR159f
1	osa-miR396f-3p
1	osa-miR398b
1	osa-miR159a.2
2	osa-miR166h:osa-miR166g
1	osa-miR395o
1	osa-miR396c
2	osa-miR159a.1:osa-miR159b
2	osa-miR396a:osa-miR396b
1	osa-miR397b
1	osa-miR395c
1	osa-miR399j
1	osa-miR168b
1	osa-miR168a
1	osa-miR159c
16	osa-miR395i:osa-miR395h:osa-miR395p:osa-miR395k:osa-miR395d:osa-miR395n:osa-miR395j:osa-miR395g:osa-miR395q:osa-miR395e:osa-miR395l:osa-miR395r:osa-miR395s:osa-miR395m:osa-miR395b
1	osa-miR393b
1	osa-miR169e
1	osa-miR398a
7	osa-miR396h:osa-miR396i:osa-miR396g
3	osa-miR164a:osa-miR164b:osa-miR164f
2	osa-miR394
2	osa-miR396d:osa-miR396e
1	osa-miR395t
1	osa-miR408
1	osa-miR395u
1	osa-miR172b
1	osa-miR156l
1	osa-miR399k
6	osa-miR169k:osa-miR169m:osa-miR169i:osa-miR169l:osa-miR169j:osa-miR169h
1	osa-miR171i
1	osa-miR169p
1	osa-miR399d
1	osa-miR172c
1	osa-miR159d
1	osa-miR396f
1	osa-miR395f
4	osa-miR399b:osa-miR399c:osa-miR399a
1	osa-miR395a
1	osa-miR393b-3p
1	osa-miR159e
2	osa-miR169o:osa-miR169n
1	osa-miR166e
6	osa-miR166b:osa-miR166c:osa-miR166d:osa-miR166a:osa-miR166f:osa-miR166n
2	osa-miR169g:osa-miR169f
1	osa-miR395v
1	osa-miR399h
5	osa-miR171a
1	osa-miR164c
3	osa-miR169c:osa-miR169b
1	osa-miR168a-3p
1	osa-miR169d
1	osa-miR171h
1	osa-miR395w
10	osa-miR156f:osa-miR156i:osa-miR156e:osa-miR156d:osa-miR156b:osa-miR156j:osa-miR156h:osa-miR156g:osa-miR156a:osa-miR156c
2	osa-miR166l:osa-miR166k
1	osa-miR396e-3p
1	osa-miR164e
1	osa-miR162a
7	osa-miR167h:osa-miR167d:osa-miR167i:osa-miR167f:osa-miR167e:osa-miR167g:osa-miR167j
1	osa-miR169a
1	osa-miR160e
1	osa-miR162b
2	osa-miR319a:osa-miR319b
5	osa-miR171d:osa-miR171b:osa-miR171e:osa-miR171c:osa-miR171f
1	osa-miR164d
1	osa-miR160f
3	osa-miR167b:osa-miR167a:osa-miR167c
1	osa-miR390
4	osa-miR160a:osa-miR160b:osa-miR160d:osa-miR160c
2	osa-miR393
8	osa-miR156k
2	osa-miR172a:osa-miR172d
1	osa-miR166m
1	osa-miR397a
1	osa-miR399i
1	osa-miR171g
1	osa-miR167a*
1	osa-miR166j:osa-miR166i
2	osa-miR169q
